# Table of Contents

## FEATURES

### *From the National Science Foundation*

**Vision and Change in Biology Undergraduate Education, A Call for Action—Initial Responses**  
Terry Woodin, V. Celeste Carter, and Linnea Fletcher .....71–73

### *Educator Highlight*

**Laura Carruth**  
Interviewed by Laura L. Mays Hoopes .....74–75

### *Current Insights*

**Recent Research in Science Teaching and Learning**  
Erin Dolan .....76–77

### *Book Review*

**Microbial Paradiso**  
José Vázquez .....78–79

## ESSAYS

**Educating Young Educators: A Pedagogical Internship for Undergraduate Teaching Assistants**  
Iyah Romm, Susannah Gordon-Messer, and Melissa Kosinski-Collins .....80–86

**Nothing in Evolution Makes Sense Except in the Light of DNA**  
Steven T. Kalinowski, Mary J. Leonard, and Tessa M. Andrews .....87–97

## ARTICLES

**Teaching Bioinformatics and Neuroinformatics by Using Free Web-based Tools**  
William Grisham, Natalie A. Schottler, Joanne Valli-Marill, Lisa Beck, and Jackson Beatty .....98–107

**Entering Research: A Course That Creates Community and Structure for Beginning Undergraduate Researchers in the STEM Disciplines**  
Nicholas Balster, Christine Pfund, Raelyn Rediske, and Janet Branchaw .....108–118

**Promoting Undergraduate Interest, Preparedness, and Professional Pursuit in the Sciences: An Outcomes Evaluation of the SURE Program at Emory University**  
Benjamin Junge, Catherine Quiñones, Jakub Kakietek, Daniel Teodorescu, and Pat Marsteller .....119–132

**Does Displaying the Class Results Affect Student Discussion during Peer Instruction?**  
Kathryn E. Perez, Eric A. Strauss, Nicholas Downey, Anne Galbraith, Robert Jeanne, and Scott Cooper .....133–140

### *On the Cover*

Cover picture shows middle-school students in Atlanta dissecting a sheep brain in an outreach program run by Laura Carruth, a biology educator and neuroendocrinologist at Georgia State University. In addition to her research and undergraduate teaching at the university, Carruth has created a week-long professional development workshop for K–12 teachers called “Why They Do What They Do at the Zoo: Animal Behavior and the Brain.” See the Educator Highlight interview with Laura Mays Hoopes on p. 74.
